# Supplementary material for: Loss of Axonal Mitochondria Promotes Tau-Mediated Neurodegeneration and Alzheimer's Disease–Related Tau Phosphorylation Via PAR-1
Source: PLoS Genet. 2012 Aug 30;8(8):e1002918. doi: 10.1371/journal.pgen.1002918 (PMC3431335; doi:10.1371/journal.pgen.1002918)
Supplement: Table S2 — Genotypes of the flies that were used in each experiment. (DOC) [file pgen.1002918.s015.doc]

| Figure 1 | milton RNAiGD | UAS-milton RNAiGD/+; gmr-GAL4/+;+/+ |
| --- | --- | --- |
| control | +/+;gmr-GAL4/+;+/+ |
| tau | +/+;gmr-GAL4/+;UAS-tau/+ |
| tau+milton RNAiGD | UAS-milton RNAiGD/+;gmr-GAL4/+;UAS-tau/+ |
| tau+milton RNAiTRiP | +/+;gmr-GAL4/+;UAS-tau/UAS-milton RNAiTRiP |
| tau+Miro RNAiKK | +/+;gmr-GAL4/UAS-Miro RNAiKK;UAS-tau/+ |
| tau+Miro RNAiiai | +/+;gmr-GAL4/+;UAS-tau/UAS-Miro RNAiiai |
| Miro RNAiiai | +/+;gmr-GAL4/+;UAS-Miro RNAiiai /+ |
| tau+luciferase RNAi | +/+;gmr-GAL4/UAS-luciferase RNAi;UAS-tau/+, |
| Figure 2 | tau | +/+;gmr-GAL4/+;UAS-tau/+ |
| tau+milton RNAiGD | UAS-milton RNAiGD/+;gmr-GAL4/+;UAS-tau/+ |
| control | +/+;gmr-GAL4/+;+/+ |
| milton RNAiGD | UAS-Milton RNAiGD/+;gmr-GAL4/+;+/+ |
| Figure 3 | tau | +/+;gmr-GAL4/+;UAS-tau/+ |
| tau+milton RNAiGD | UAS-milton RNAiGD/+;gmr-GAL4/+;UAS-tau/+ |
| tau+ MiroRNAiKK | +/+;gmr-GAL4/UAS-MiroRNAiKK;UAS-tau/+ |
| Figure 4 | tau | +/+;gmr-GAL4/+;UAS-tau/+ |
| tau+PAR-1 RNAi | +/+;gmr-GAL4/+;UAS-tau/UAS-PAR-1 RNAi |
| tau+PAR-1 RNAi+milton RNAiGD | UAS-milton RNAiGD /+;gmr-GAL4/+;UAS-tau/UAS-PAR-1 RNAi |
| Figure 5 | tau+milton RNAiGD | UAS-Milton RNAiGD/+;gmr-GAL4/+;UAS-tau/+ |
| tau+milton RNAiGD+PAR-1 RNAi | UAS-Milton RNAiGD/+;gmr-GAL4/+;UAS-tau/UAS-PAR-1 RNAi |
| tau+milton RNAiGD+luciferase RNAi | UAS-Milton RNAiGD/+;gmr-GAL4/UAS-luciferase RNAi;UAS-tau/+ |
| tau | +/+;gmr-GAL4/+;UAS-tau/+ |
| S262Atau | +/+;gmr-GAL4/+;UAS-S262Atau/+ |
| tau+milton RNAiGD | UAS-milton RNAiGD/+;gmr-GAL4/+;UAS-tau/+ |
| S262Atau+milton RNAiGD | UAS-milton RNAiGD/+;gmr-GAL4/+;UAS-S262Atau/+ |
| Figure 6 | PAR-1 in A | +/+;gmr-GAL4/+;UAS-PAR-1-myc/+ |
| PAR-1+milton RNAiGD | UAS-Milton RNAiGD/+;gmr-GAL4/+;UAS-PAR-1-myc/+ |
| PAR-1 in B | +/+;gmr-GAL4/+;UAS-PAR-1myc/UAS-luciferase |
| PAR-1+milton RNAiTRiP | +/+;gmr-GAL4/+;UAS-PAR-1myc/UAS-milton RNAiTRiP |
| PAR-1 in C | +/+;gmr-GAL4/+;UAS-PAR-1-myc/+ |
| PAR-1+Miro RNAiKK | +/+;gmr-GAL4/UAS-Miro RNAiKK;UAS-PAR-1myc/+ |
| PAR-1 in D | +/+;gmr-GAL4/+;UAS-PAR-1-myc/+ |
| PAR-1+Luciferase RNAi | +/+;gmr-GAL4/UAS-luciferase RNAi;UAS-PAR-1myc/+ |
| PAR-1 T408A | +/+;gmr-GAL4/+;UAS-PAR-1 T408A-myc/+ |
| PAR-1 T408A+milton RNAiGD | UAS-Milton RNAiGD /+;gmr-GAL4/+;UAS-PAR-1 T408A-myc/+ |
| Figure 7 | milton RNAiGD in A | UAS-Milton RNAiGD/elav-GAL4; gmr-GAL4/+;+/+ |
| control in B | elav-GAL4/+;gmr-GAL4/UAS-luciferase RNAi;+/+ |
| milton RNAiGD in C, D and E | UAS-Milton RNAiGD/+; gmr-GAL4/+;+/+ |
| control in F | +/+;gmr-GAL4/+;+/+ |
| milton RNAiTRiP in H and I | elav-GAL4/+; gmr-GAL4/+;UAS-milton RNAiTRiP/+ |
| control in J | elav-GAL4/+;gmr-GAL4/+;UAS-luciferase/+ |
| Miro RNAiKK in L | +/+;gmr-GAL4/UAS-MiroRNAiKK;+/+ |
| control in M | +/+;gmr-GAL4/+;+/+ |
| Figure 8 | milton RNAiGD in A and E | UAS-milton RNAiGD/+; gmr-GAL4/+;+/+ |
| milton RNAiGD+tau RNAi | UAS-milton RNAiGD/+;gmr-GAL4/+;UAS-tauRNAi/+ |
| milton RNAiGD+luciferase RNAi | UAS-milton RNAiGD/+;gmr-GAL4/UAS-luciferase RNAi;+/+ |
| milton RNAiGD+PAR-1 RNAi | UAS-milton RNAiGD/+;gmr-GAL4/+;UAS-PAR-1 RNAi/+ |

**Table S2. Fly genotypes.**
